# Supplementary material
Source: Research Square preprint supplement (doi:10.21203/rs.3.rs-9510590/v1)

**Table 1. G-PGS Atlas Model versus published disease-specific polygenic scores.** Per-disease classification results for 934 individuals (733 disease, 201 healthy controls). For each disease: sample size (n), GAM cross-validated AUC with bootstrap 95% confidence interval, best published PGS AUC, number of disease-matched PGS tested, AUC margin (GAM minus best PGS), and number of published PGS outperformed. GAM outperforms all 676 tested PGS across all 11 diseases (100%). Median module AUC = 0.956. Median margin versus best PGS per disease = +0.192; median margin across all 676 individual PGS comparisons = +0.347.


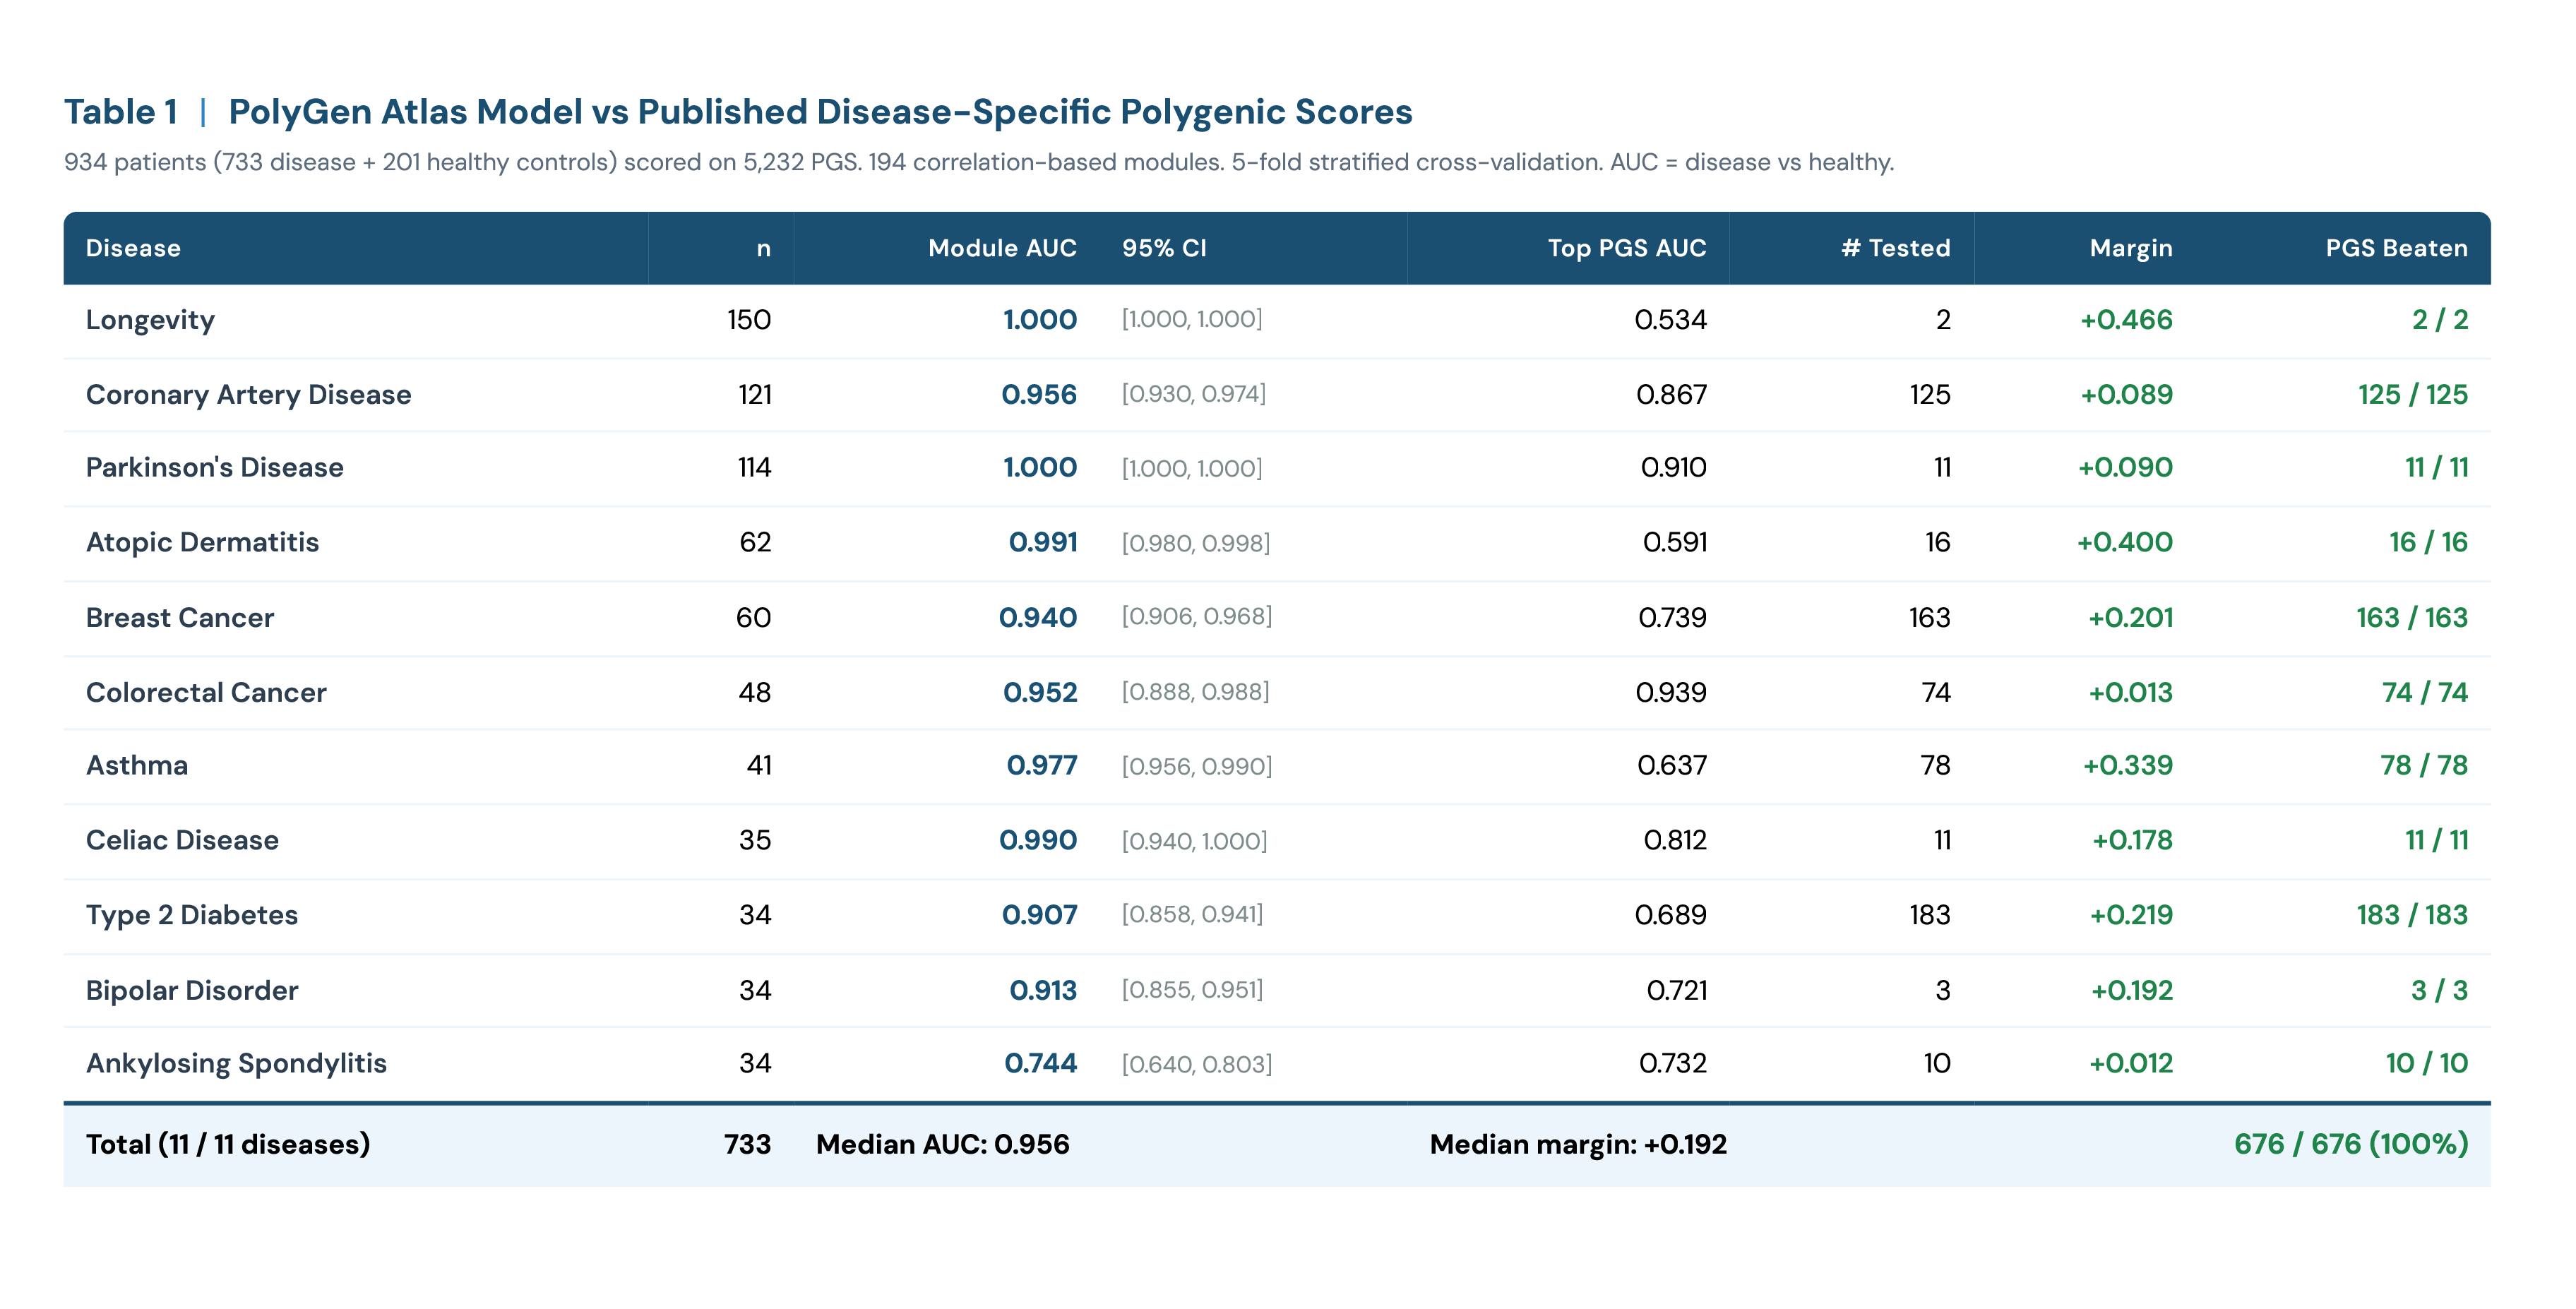

Supplement: Supplementary file 1 [file a901717f833dd2acb73ec611.docx]
